# Supplementary material for: Modelling the impacts of emission changes on O 3 sensitivity, atmospheric oxidation capacity and pollution transport over the Catalonia region
Source: Copernicus journal article supplement (doi:10.5194/egusphere-2023-160), 2023-03-08
Supplement: Supplementary file [file egusphere-2023-160-AC2-supplement.pdf]

## Response to Reviewers

We thank the reviewers for the constructive comments and suggestions which have helped us improve the manuscript. Below we give full detailed answers to each issue raised by each reviewer. Our response is in blue, to differentiate from the comment which is in black. Furthermore, we include any new text added in the manuscript in red, to facilitate this second revision.

To summarize the main changes to the manuscript, we would like to point out:

1. We have expanded the discussion section to include 1) a more detailed description of the two different photochemical regimes that describe the sensitivity of O<sub>3</sub> to its precursors, 2) a new figure entitled “O<sub>3</sub> concentration as a function of VOC/NO<sub>x</sub> concentration.”, 3) more description of the trajectory experiments using the FLEXPART-WRF model and 4) further justification of the chemical scheme chosen for the simulations.
2. We have rewritten the main text to clarified that changes in the oxidation capacity are related to O<sub>3</sub> concentrations given that VOC and CO oxidation by OH are the initial reactions for ozone formation and we have expanded the discussion of the oxidation capacity.
3. We have added more references to support the main text when introducing the tropospheric ozone and O<sub>3</sub> photochemical regimes.

### Response to comments of Reviewer 2

This is an interesting paper looking at the impact of emissions reductions on atmospheric chemistry. It takes the area in and around the Barcelona metropolitan area as a natural laboratory, and studies two periods in 2020 as exemplar systems to understand the effect of emissions reductions on ozone and NO<sub>2</sub>.

The paper describes a model study using WRF-Chem coupled to an urban canopy model to look at atmospheric processes over the AMB region, and FLEXPART-WRF to do some trajectory analysis to study the chemistry occurring as air flows inland.

This is an ambitious study which aims to use the connection between the natural experiment of emissions reductions in the months of April/May 2020, and through analysis of idealised counterfactual experiments perform attribution of the effect of emissions reductions.

The experimental design and analysis appear sound and this manuscript fits well within the scope of ACP. I feel the structure of the manuscript could be improved, and the discussion should be improved in places before publication.

**Response:** We thank the reviewer for his/her comments. Below are our point-by-point replies to each specific comment raised by reviewer 2.

## Specific comments

The title is the first area to address - I felt it was perhaps a bit too general, as the main focus is the impact of lockdown.

Response: Thank you for your comment. We feel that the main focus of this manuscript is to discuss the impact of emission reductions on ozone chemistry (O<sub>3</sub> sensitivity, atmospheric oxidation capacity, and pollution transport from the city to rural areas). The lockdown period provided an excellent opportunity to do this because of the drastic emission reduction imposed on the city due to transport and industrial activity restrictions. It gave us an unprecedented opportunity to study these mechanisms, but our focus is not on the air quality consequences of the lockdown and thus feel justified in our choice of title.

The abstract can also be a bit more explicit eg L8/9 'response of ozone chemistry to changes' could make more explicit what reduction is under discussion.

Response: Thank you for this comment. We have now expanded these lines and this part of the abstract now reads:

The aim is to investigate the response of ozone chemistry to reduction of precursor emissions (NO<sub>x</sub>, VOC).

AOC needs to be defined in the abstract, and for the sake of clarity that it excludes O<sub>3</sub> oxidant.

Response: Thank you for this comment. We have clarified that we are talking about OH and NO<sub>3</sub> radicals here.

This part of the abstract now reads:

3) the increase in the maximum O<sub>3</sub> level (up to 6%) during the emission-reduction period could be attributed to an enhancement in the atmospheric oxidants hydroxyl and nitrate radical (OH and NO<sub>3</sub>) given their strong link with O<sub>3</sub> loss/production chemistry

Abstract Conclusion # 3 is not clear - what is the mechanism? Conclusion #4 could the authors explain why May is important? Conclusion 5 - not sure what is meant by a change contributing to a plume. Perhaps re-word?

Response: Thank you for these suggestions. We have rewritten the abstract to clarify these conclusions. This part of the abstract now reads:

3) the increase in the maximum O<sub>3</sub> level (up to 6%) during the emission-reduction period could be attributed to an enhancement in the atmospheric oxidants hydroxyl and nitrate

radical (OH and NO<sub>3</sub>) given their strong link with O<sub>3</sub> loss/production chemistry, 4) the daily maximum levels of ozone and odd oxygen species (O<sub>x</sub>) generally decreased (4%) in May -a period with intense radiation which favors ozone production- with the reduced atmospheric OH and NO<sub>3</sub> oxidants, indicating an improvement in the air quality, 5) ozone concentration changes in the urban plume of Barcelona contribute significantly to the level of pollution along the 150km south-to-north valley to the Pyrenees.

S2 describes the region selected for study, geography, Barcelona's air quality with respect to guidelines, the Vic Plain and the ozone situation in 2020. Two periods are identified for closer study, and also days of even closer study. I feel the manuscript would be more readable if it would be possible to decide on a single consistent nomenclature for the two periods, eg P1 and P2 and so avoid changing between Mar-Apr/lockdown/first period and May/relaxation through the text

Response: Thank you for this comment. We feel that nomenclature of P1 and P2 is not intuitive to understand the two periods analysed, and writing out "March-April" and "May" does not occupy much more space, so we would rather cut down the acronyms and write out the periods.

L174-185 Some of this section could be grouped with the discussion of the trajectory experiments, as it mixes model description with some analysis that probably belongs with the discussion in S5.3. It would be interesting to better justify why these days were chosen for further study - what aspects do these days/analysis bring out?

Response: Thank you for this comment. We have now included more information about the selection of these days in section 2 and moved information to the discussion of the trajectory in Section 5.3. In addition, Figures 3-4 have been moved to section 5.3 and all Figures have been renumbered according to these changes.

Section 2, lines 168-172: In addition, we select two days in the lockdown period (the 3rd and 6th of April) and two days in the relaxation period (the 22nd and 26th of May), during which high ozone concentrations were registered (see Table S1 in the Supplement) and there is a clear influence of the air masses from the AMB to rural areas far from the city (discussed in section 5.3), to study the changes in the O<sub>3</sub> circulation from Barcelona (Ciutadella) to the Pyrenees mountains (Pardines), including the Vic plane (Tona) and Montseny.

Section 5.3, lines 391-402: Figures 9 and 10 show the trajectories of the air masses arriving at the monitoring stations on the selected days; which were modelled with the Lagrangian particle dispersion model FLEXPART-WRF (Brioude et al., 2013). This version of the Lagrangian model works with the WRF mesoscale meteorological model, with the same parametrization as the WRF-Chem model (see section 3.1). The transport model has been

run in backwards mode, which means that what is represented in each plot is the residence time, at each grid cell of the map, for the air masses arriving at each site. Twenty-four-hour back trajectories were calculated for each day at a release time of 16 h and with a grid cell size of 0.03 x 0.03 degrees. Figures 9 and 10, show that the air masses on the 3rd of April and 22 of May were transported from the AMB to rural areas such Montseny and the Vic Plain, and we can see an influence from the bottom layers (0-300 m) and the upper layers (300-2000 m) at the different sites. The air masses on the 6th of April were channelled from the AMB northwards to Montseny, the Vic Plain and the Pyrenees. The air masses on the 26th of May were also transported from the AMB northwards to Montseny, the Vic Plain and the Pyrenees, but the air masses that arrived at the surfaces of these locations had strong local components and larger influences from the upper layers.

S3 describes the WRF-Chem experiments performs some model evaluation against observations. The model is shown to be more skillful in meteorology than chemistry, with ozone biases around 20-30% shown. The authors do not discuss if the bias in the model means that the model correctly simulates the difference in ozone/NO<sub>2</sub> from a change in emissions. Given the chemistry is non-linear, would the response be greater/smaller in a less biased model? Would it make sense to compare ozone changes in the model with differences in climatology/COVID period at the observation stations of interest to assess if the model gets delta\_O<sub>3</sub> correct?

Response: Thank you for this constructive comment. As you already point out, the chemistry is non-linear and it's not a straight forward answer. Reductions in observation stations in the city of Barcelona for NO<sub>2</sub> and O<sub>3</sub> concentrations in the lockdown and relaxation periods are given by Querol et al., 2021. This study calculates a reduction in NO<sub>2</sub>, with meteorology correction, between 46-50% and 19-23% for the lockdown and full relaxation periods, respectively. In the case of 8hDM O<sub>3</sub>, the changes in concentrations, with meteorology correction, are between -1-6% and -9- -2% for the lockdown and full relaxation periods. These changes are in line with our model changes for these two species (excluding the airport area that has higher changes). We have added more discussion about the model bias in the manuscript as well as added the reference of Querol et al., 2021.

Section 3, lines 263-265: Although the model exhibits these biases, the modelled air quality changes presented in the next section are in line with other studies such as Querol et al.,2021 that present a comparison between data from years 2015-2019 and the lockdown and relaxation periods for the year 2020 in the city of Barcelona.

Section 6, lines 473-475: In addition, the difficulty of models in simulating urban ozone precursors such as NO<sub>x</sub> and VOC levels and, consequently, its link with the ozone chemistry should be addressed in future work to use the models as effective tools for assessing future studies aimed at reducing air quality.

Querol, X., Massagué, J., Alastuey, A., Moreno, T., Gangoiti, G., Mantilla, E., Duéquez, J. J., Escudero, M., Monfort, E., Pérez García-Pando, C., Petetin, H., Jorba, O., Vázquez, V., de la Rosa, J., Campos, A., Muñoz, M., Monge, S., Hervás, M., Javato, R., & Cornide, M. J. (2021). Lessons from the COVID-19 air pollution decrease in Spain: Now what? In *Science of The Total Environment* (Vol. 779, p. 146380). Elsevier BV. <https://doi.org/10.1016/j.scitotenv.2021.146380>

S4 describes the results of the experiments. This section in the MS has the most potential for improvement, I feel. Firstly, the changes in O<sub>3</sub>, NO<sub>2</sub> and Ox are given in the supplementary. Is it worth moving figures S3 and S4 into the main text? I appreciate the changes are given in absolute (LH) and relative (RH) terms for both period 1 and period 2. Could the labelling of these figures be improved to indicate what data are plotted in each of the four rows? There are no labels on each of the second and fourth rows. The text in S4.1 could do with a further polish, e.g.

Response: Thank you for this comment. We feel the manuscript is already overloaded with figures (currently 14 figures), and would rather keep these two figures in supporting information. Figures S3-S6 have been improved to indicate what data is plotted in each row (AMB and CAT). We have also edited the captions to indicate that the Catalonia region is shown as CAT. The newly revised figures are:

# March-April

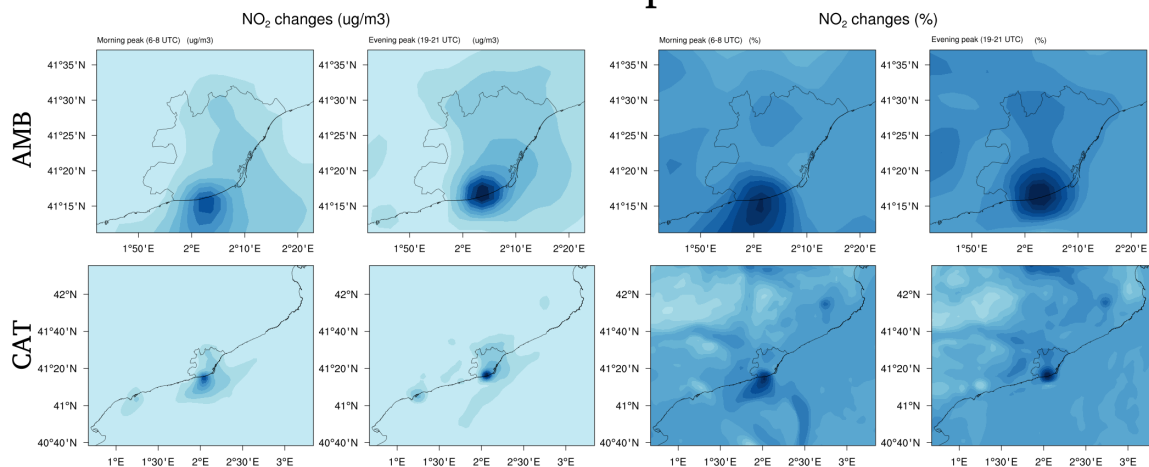

# May

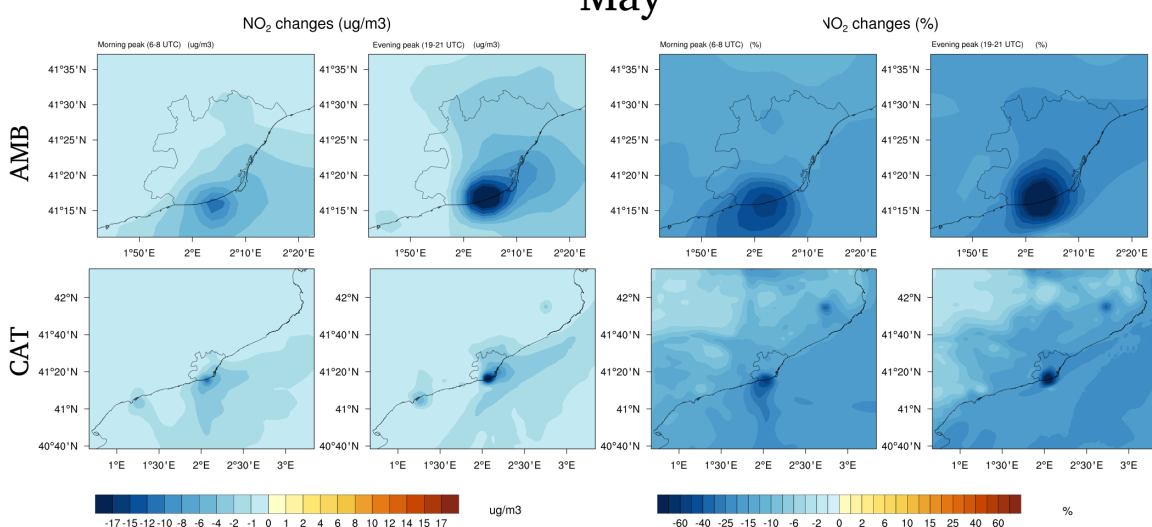

Figure S3: Averaged surface NO<sub>2</sub> changes over the Metropolitan Area of Barcelona (AMB) and the Catalonia region (CAT) during 30 March to 12 April (only weekdays) and 18 to 30 May (only weekdays) in absolute value (ug/m<sup>3</sup>) and relative change (%). Relative change (%) is calculated as (COVID-BAU)/BAU×100..

# March-April

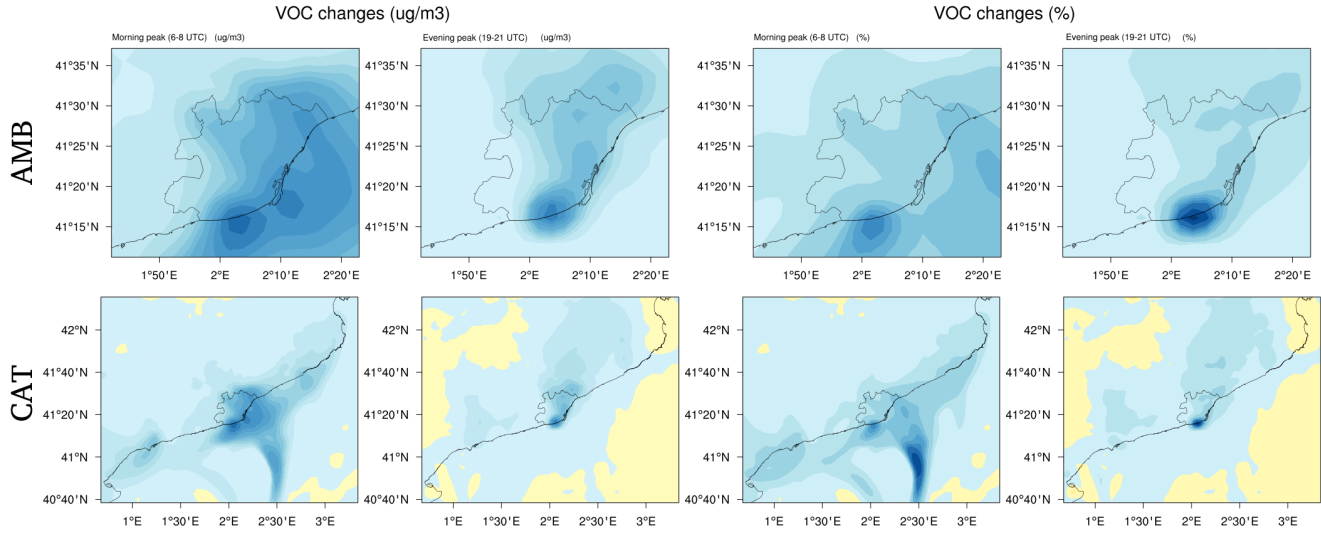

# May

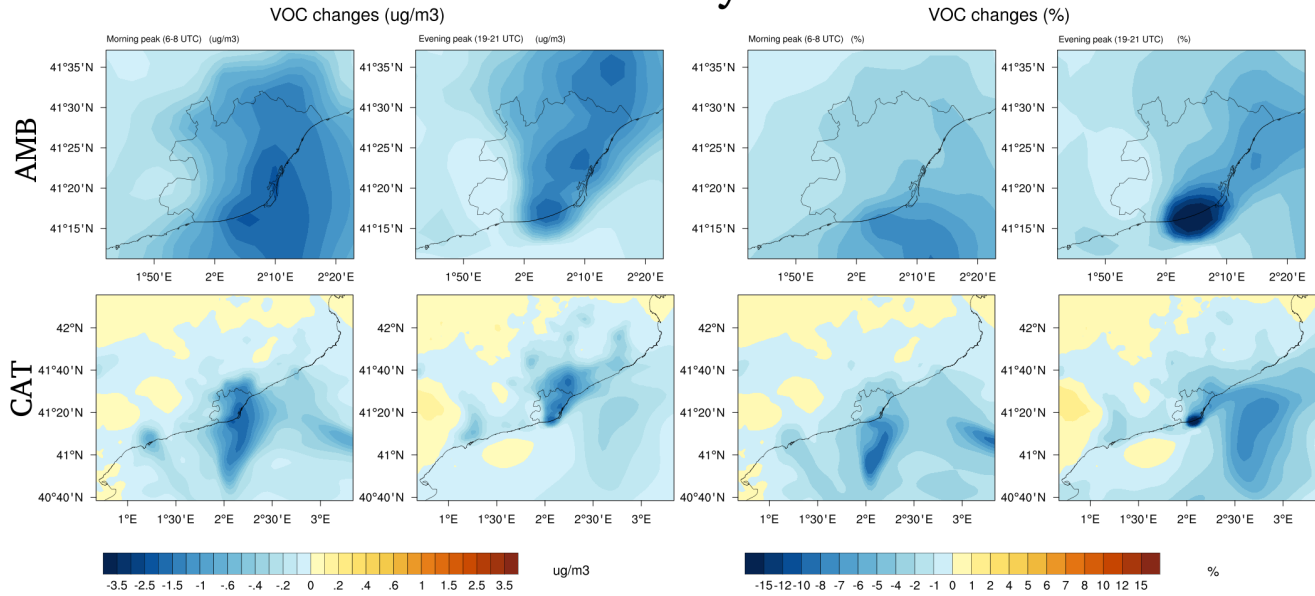

Figure S4. Same as Figure S3 for VOC changes.

# March-April

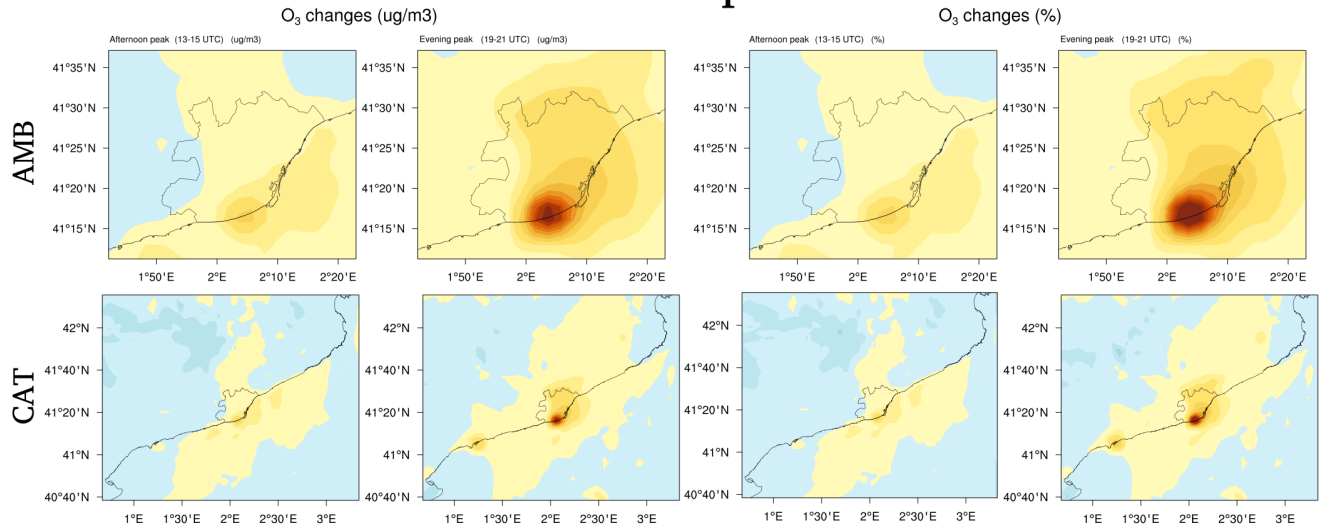

# May

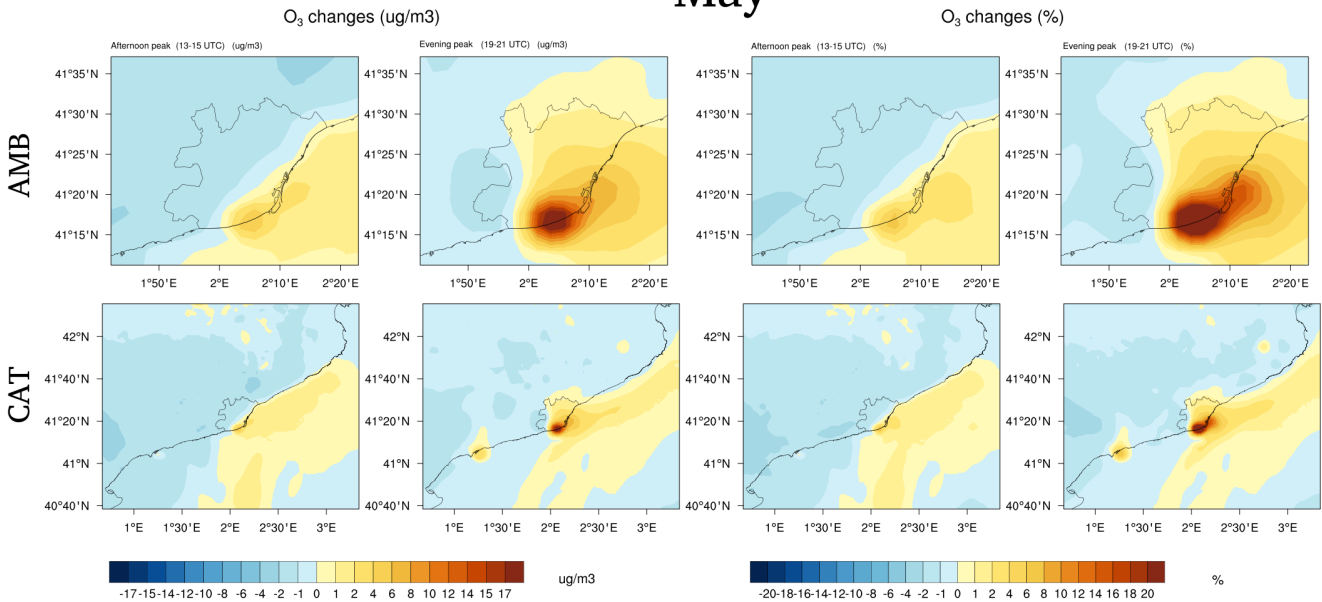

Figure S5. Same as Figure S3 for O<sub>3</sub> changes.



# March-April

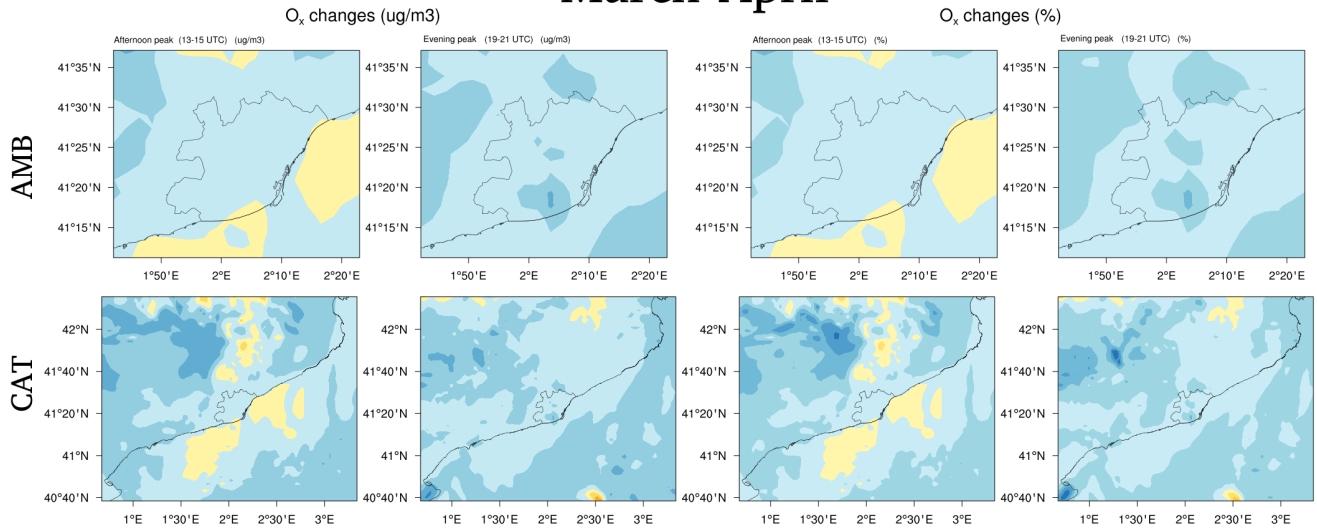

# May

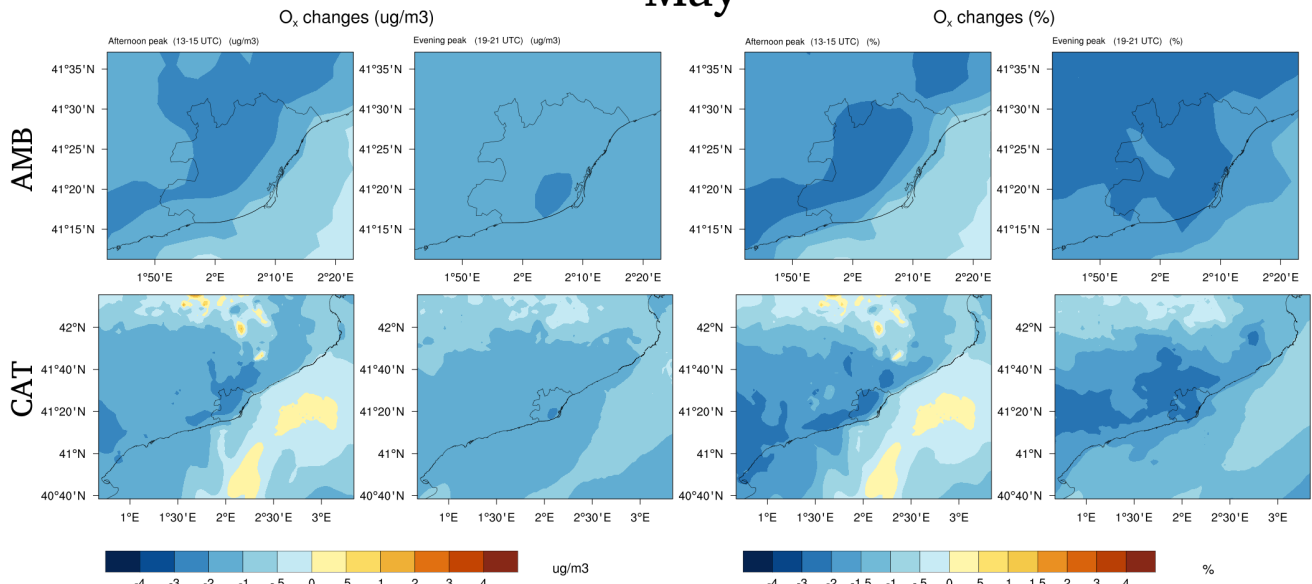

Figure S6. Same as Figure S3 for  $O_x$  changes.

Additionally, we have applied the same changes to Figures 7 and 8, which we have been updated to indicate what data is plotted in each row (AMB and CAT) and the captions have been edited to indicate that the Catalonia region is show as CAT.

# March-April

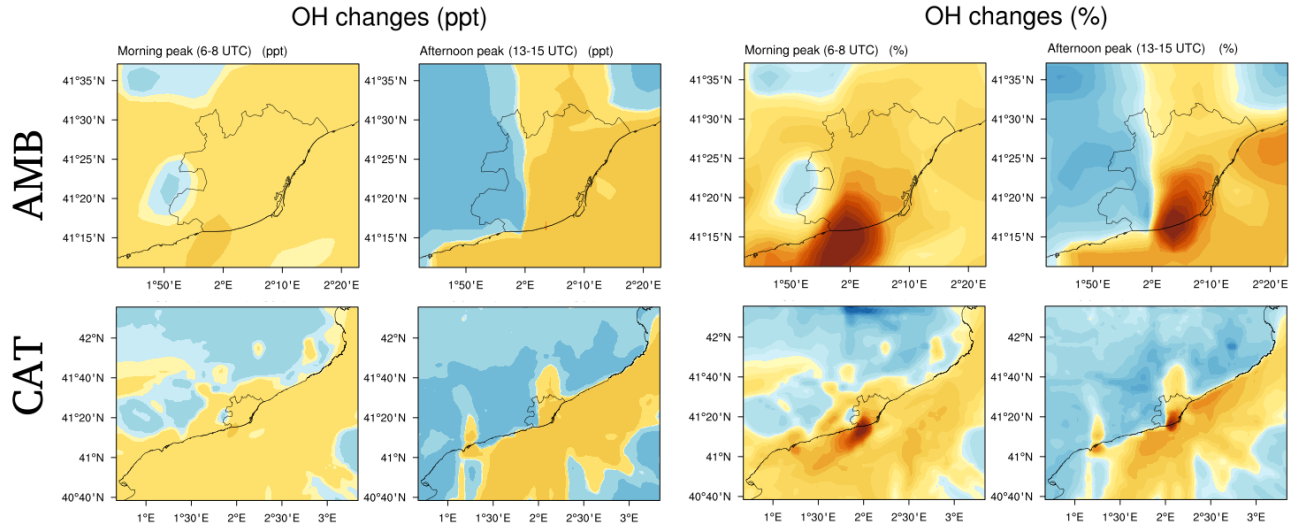

# May

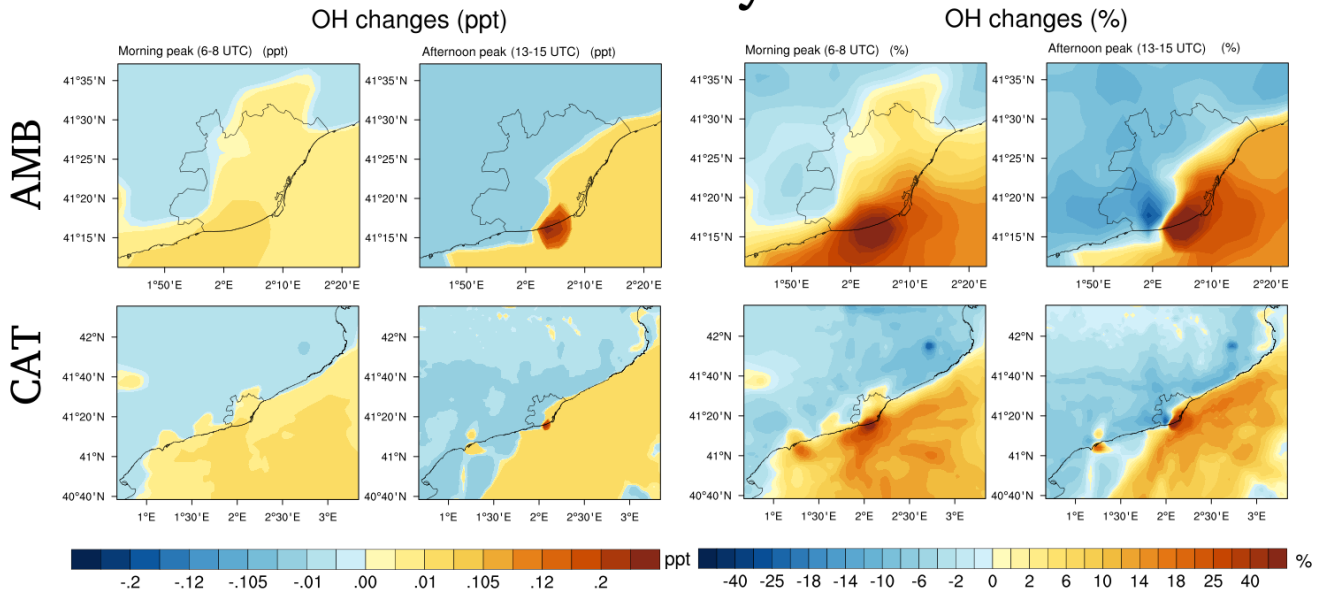

Figure 7. Morning and afternoon averaged surface OH changes over the Metropolitan Area of Barcelona (AMB) and the Catalonia region (CAT) during 30 March to 12 April (only weekdays) and 18 to 30 May (only weekdays), with absolute values (ppt) and relative changes (%) shown. Relative changes (%) were calculated as  $((\text{COVID-BAU})/\text{BAU}) \times 100$ .

# March-April

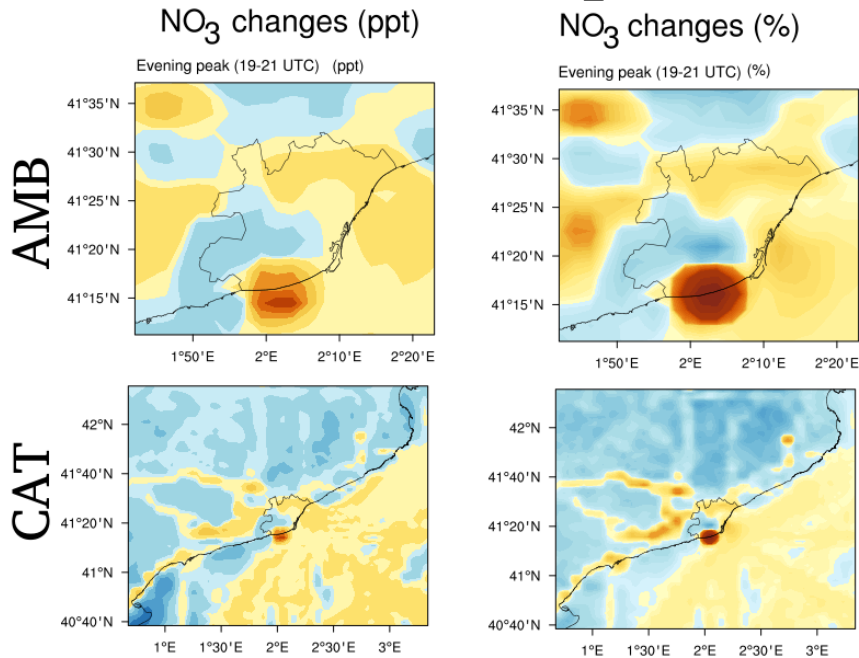

# May

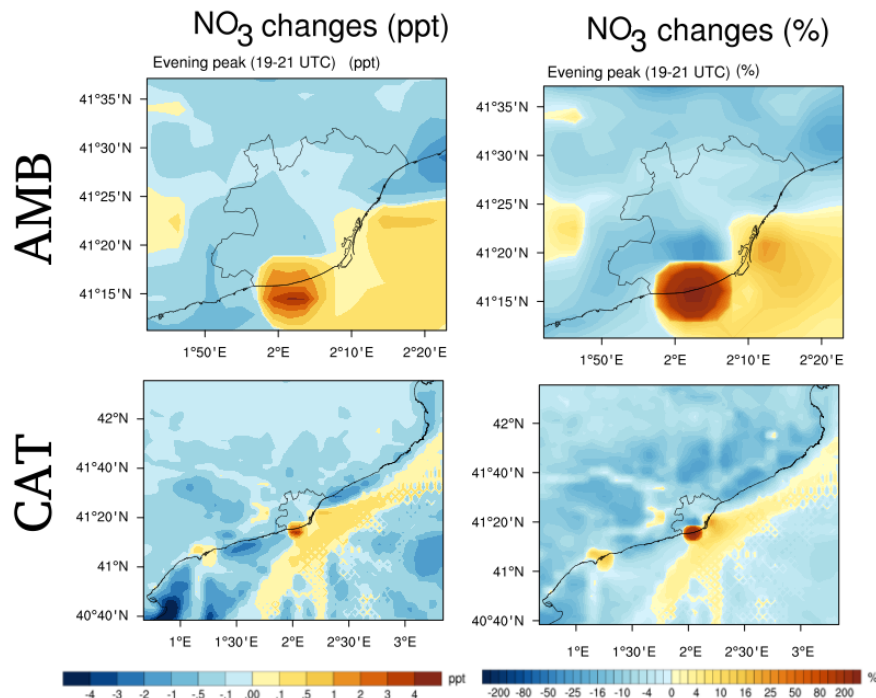

Figure 8. Evening-averaged surface NO<sub>3</sub> changes over the Metropolitan Area of Barcelona (AMB) and the Catalonia region (CAT) during 30 March to 12 April (only weekdays) and 18 to 30 May (only weekdays), with absolute values (ppt) and relative changes (%) shown. Relative changes (%) were calculated as  $((\text{COVID-BAU})/\text{BAU}) \times 100$ .

The text in section 4.1, has been improved:

**Section 4.1:** During the first period (30 March to 12 April) we see a general reduction in NO<sub>2</sub> concentrations of the COVID simulation with respect to the BAU all over the Catalonia region at the surface level, with high reductions found during the evening peaks (19-21 UTC) and over the AMB (-2 to -18  $\mu\text{g m}^{-3}$ , -10 to -70%) (see Fig. S3 in the Supplement). The highest reductions were found around the airport due to a reduction in air traffic emissions (see Figure 3). The surface concentrations of VOCs were slightly lower during the morning peak, with reductions up to -2  $\mu\text{g m}^{-3}$  (-10%) as can be appreciated in Fig. S4 of Supplementary information. Similarly, there was also a reduction during the evening peak, up to -1.5  $\mu\text{g m}^{-3}$  (-12%). Note that during the lockdown, the VOC emissions increased up to 7% in the stationary combustion sector (see Figure 3). Changes in emissions that showed a significant decrease in NO<sub>2</sub> concentrations and slight decreases in VOC concentrations enhanced O<sub>3</sub> levels over the AMB. This is consistent with the observations, where there was a decrease in NO<sub>2</sub> concentrations (40-80%) and an increase in O<sub>3</sub> levels (up to 10%) between 2015-2019 and 2020 during the lockdown (see Figs. S1-S2 in the Supplement). Note that, we need to consider the influence of the meteorological conditions to analyze changes in the air quality observations. The reduction of O<sub>3</sub> concentrations that normally result from lower levels of precursors was canceled by a reduction in NO titration, resulting in a net increase in O<sub>3</sub> levels. During the evening peaks (19-21 UTC), we found the highest increases in O<sub>3</sub> of the COVID simulation compared to the BAU (1 to 18  $\mu\text{g m}^{-3}$ , 1 to 20%). However, when surface O<sub>3</sub> concentrations were higher (afternoon peak, 13-15 UTC), the increases in O<sub>3</sub> levels were much lower (up to 6  $\mu\text{g m}^{-3}$ , 6%) than those for the evening peak (see Fig. S5 in Supplement). Outside the AMB, the concentrations did not differ significantly (< 2  $\mu\text{g m}^{-3}$ , < 2%) between BAU and COVID simulations. Differences in the Ox (NO<sub>2</sub> + O<sub>3</sub>) values were calculated to aid our interpretation of the O<sub>3</sub> concentrations by diminishing the effect of O<sub>3</sub> titration by NO in highly polluted areas (see Fig. S6 in Supplement). The overall changes between BAU and COVID in the Ox concentrations remained practically constant due to a balance between the increases in O<sub>3</sub> levels and decreases in NO<sub>2</sub> levels. This has important policy implications because one air pollutant problem is being replaced by another, which is an undesirable consequence due to the ground-level ozone effects on human health, vegetation, and ecosystems. A similar result was seen by \cite{acp-21-4169-2021}, which found that Ox concentrations only changed very slightly due to the lockdowns across most European urban areas.

The differences between the BAU and COVID simulations for the second period (18 to 30 May) showed overall reductions in the NO<sub>2</sub> (-2 to -15  $\mu\text{g m}^{-3}$ , -10 to -65%) and VOC levels (up to -2  $\mu\text{g m}^{-3}$ , -16%), with high reductions found during the evening peaks (see Fig. S3 in the Supplement). Ozone levels decreased (by up to 3.5  $\mu\text{g m}^{-3}$ , see Fig. S5 in the Supplement) in most of Catalonia due to significant reductions in most of the emission sectors (see Figure 3) during the COVID simulation, which decreased the high ozone productivity normally seen for this time of the year. However, we still found enhanced O<sub>3</sub> levels around the Barcelona

airport in the evenings; the reductions in emission levels were still significant (more than 80%, see Figure 3) and inhibited titration of the O<sub>3</sub> by NO. Note that in this case, the Ox concentrations decreased nearly everywhere in the Catalonia area and up to -4 µg m<sup>-3</sup> over the AMB (see Fig. S6 in Supplement) for the COVID simulation, resulting in overall improvements in the air quality.

L27 is 1% significant?

Response: Thank you for pointing this out. We agree that 1% is not significant. This sentence have been removed from the manuscript.

L285 the 'two simulations' of what?

Response: Thank you. We have clarified in the updated manuscript that the two simulations are BAU and COVID. The text now reads:

Outside the AMB, the concentrations did not differ significantly (< 2 µg m<sup>-3</sup>, < 2%) for the two between BAU and COVID simulations.

L287 constant between what?

Response: Thank you. We mean constant between the two simulations analysed: BAU and COVID. Now it is clarified on the text:

The overall changes between BAU and COVID in the Ox concentrations remained practically constant due to a balance between the increases in O<sub>3</sub> levels and decreases in NO<sub>2</sub> levels.

SS5.1 is interesting. I presume the graphs shown are for model results, and it would help to have this stated. Did the authors consider performing a similar analysis for observational data for this period? Is it difficult due to a lack of VOC data? The captions of Figure 6-8 needs to state explicitly that these are 'Changes...' between BAU and COVID

Response: Thank you for this suggestion. It is not possible to perform a similar analysis for observational data due to the lack of VOC data in this region. Figures 6-8 show ozone concentrations for the two model simulations: BAU and COVID. The captions of Figure 6-8 have been updated to make this clear.

Caption Figure 6: Modelled O<sub>3</sub> concentrations (top panels) for 30 March to 12 April (only weekdays) and 18 to 30 May (only weekdays) for both simulations, BAU (left panels) and COVID (right panels), over the AMB area during the morning (6-8 UTC). Each dot of the top

row corresponds to the O<sub>3</sub> concentration difference (ppb) of one grid cell of the AMB at the surface level. The dots in the lower row represent the land use for each model grid cell.

Colouring data by ozone change and land use/land cover is interesting, and the broken lines make the analysis goal clear. I would like to see the analysis better justified, though. I assume it is correct to use the lines which are derived from an analysis of transition regimes based on NO<sub>x</sub> and VOC emissions in Sillman (rather than changes in NO<sub>x</sub>/VOC levels used here) but I'd like the paper to discuss somewhere how these regimes apply when discussing a change in O<sub>3</sub> and a change in NO<sub>x</sub> or VOC levels, particularly in identifying regions of the diagrams here with NO<sub>x</sub>- or VOC-limited regimes, which seems key. I've not seen an analysis like this before, so would like to see this expanded upon.

Response: Thank you for this constructive comment. NO<sub>x</sub>/VOCs regimes based on NO<sub>x</sub>/VOC levels are used in several papers such as Yang et al., (2021), Wang et al., (2021) and Ren et al., (2022). Yang et al., (2021) use the same lines and transition regimes as NO<sub>x</sub>/VOC emissions in Sillman et al., 1990. Following Wang et al., (2021) and Ren et al., (2022) we establish a relationship between surface VOC/NO<sub>x</sub> and O<sub>3</sub> concentrations, and, subsequently, we derive the line separating two different photochemical regimes by the local O<sub>3</sub> maximum:

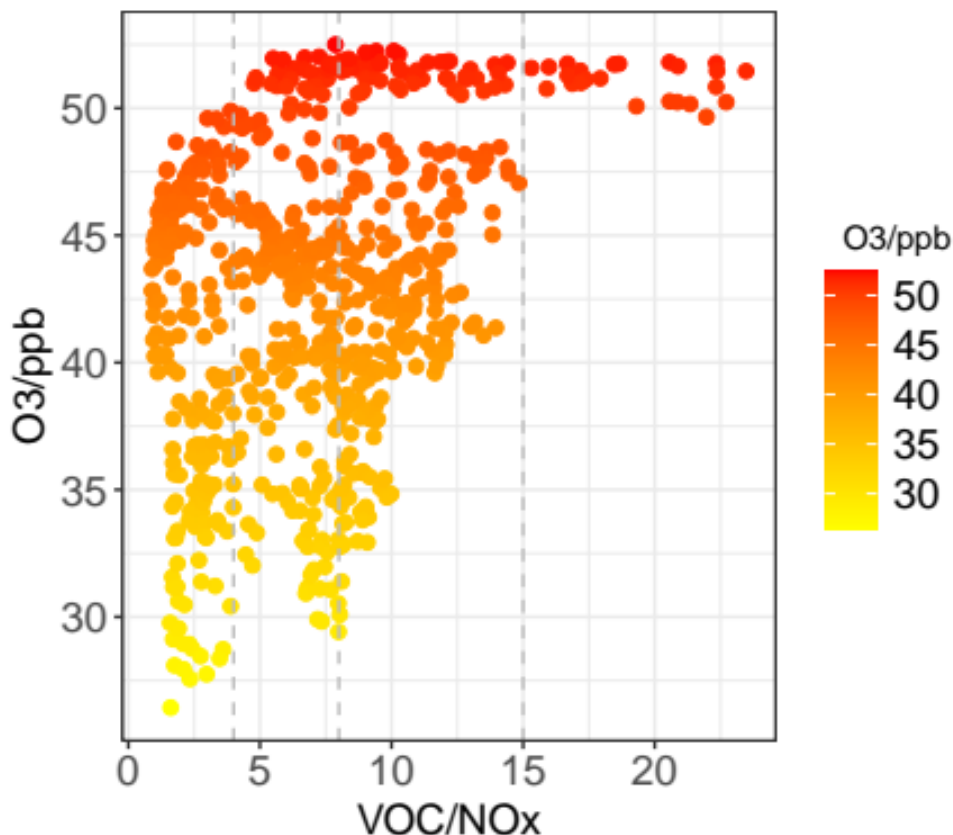

Figure S7: O<sub>3</sub> concentration as a function of VOC/NO<sub>x</sub> concentration. Points are calculated with a 5 hours average concentration for the two periods using the BAU simulation. Dark vertical line separate the two photochemical regimes by the local O<sub>3</sub> maximum. Grey vertical lines separate the transitional regimes.

The local O<sub>3</sub> maximum occurs when VOC:NO<sub>x</sub>  $\approx$  8, coinciding with the ratio defined in Sillman et al., 1999. Therefore, we use the same lines as Sillman et al., (1999). We have added this Figure in the Supplementary information and add more information into the discussion to describe this analysis including new references.

Yang, L., Yuan, Z., Luo, H., Wang, Y., Xu, Y., Duan, Y., & Fu, Q. (2021). Identification of long-term evolution of ozone sensitivity to precursors based on two-dimensional mutual verification. In *Science of The Total Environment* (Vol. 760, p. 143401). Elsevier BV. <https://doi.org/10.1016/j.scitotenv.2020.143401>

Wang, W., van der A, R., Ding, J., van Weele, M., and Cheng, T.: Spatial and temporal changes of the ozone sensitivity in China based on satellite and ground-based observations, *Atmos. Chem. Phys.*, 21, 7253–7269, <https://doi.org/10.5194/acp-21-7253-2021>, 2021.

Ren, J., Guo, F., and Xie, S.: Diagnosing ozone–NO<sub>x</sub>–VOC sensitivity and revealing causes of ozone increases in China based on 2013–2021 satellite retrievals, *Atmos. Chem. Phys.*, 22, 15035–15047, <https://doi.org/10.5194/acp-22-15035-2022>, 2022.

Sillman, S.: The relation between ozone, NO<sub>x</sub> and hydrocarbons in urban and polluted rural environments, *Atmospheric Environment*, 33, 1821–1845, [https://doi.org/https://doi.org/10.1016/S1352-2310\(98\)00345-8](https://doi.org/https://doi.org/10.1016/S1352-2310(98)00345-8), 1999.

Section 5.1, lines 313-317: It should be noted that Sillman et al., (1999) use changes in VOC:NO<sub>x</sub> emissions rather than changes in VOC:NO<sub>x</sub> levels used in this study. In this study, we follow Wang et al., (2021) and Ren et al., (2022) that establish a relationship between surface VOC:NO<sub>x</sub> and O<sub>3</sub> concentrations, and, subsequently, derive the line separating the two different photochemical regimes by the local O<sub>3</sub> maximum (see Figure S7 in the Supplement). The local O<sub>3</sub> maximum occurs when VOC:NO<sub>x</sub>  $\approx$  8, coinciding with the ratio defined in Sillman (2003).

L315 and on, could the authors explain how the figures can be used to support this statement?

Response: Thank you for point this out. We have rewritten the text to clarify that in line 315 we are talking about “urban forest”:

Overall, without any reduction in emissions (BAU simulation), this analysis indicates that urban forests far from anthropogenic sources and influenced by high biogenic VOC emissions, the photochemical regime of O<sub>3</sub> formation is NO<sub>x</sub>-sensitive in the mornings and afternoons.



Following previous discussion, Figures 6 and 7 and Table 3 support that the photochemical regime of O<sub>3</sub> formation is NO<sub>x</sub>-limited in the mornings and afternoons:

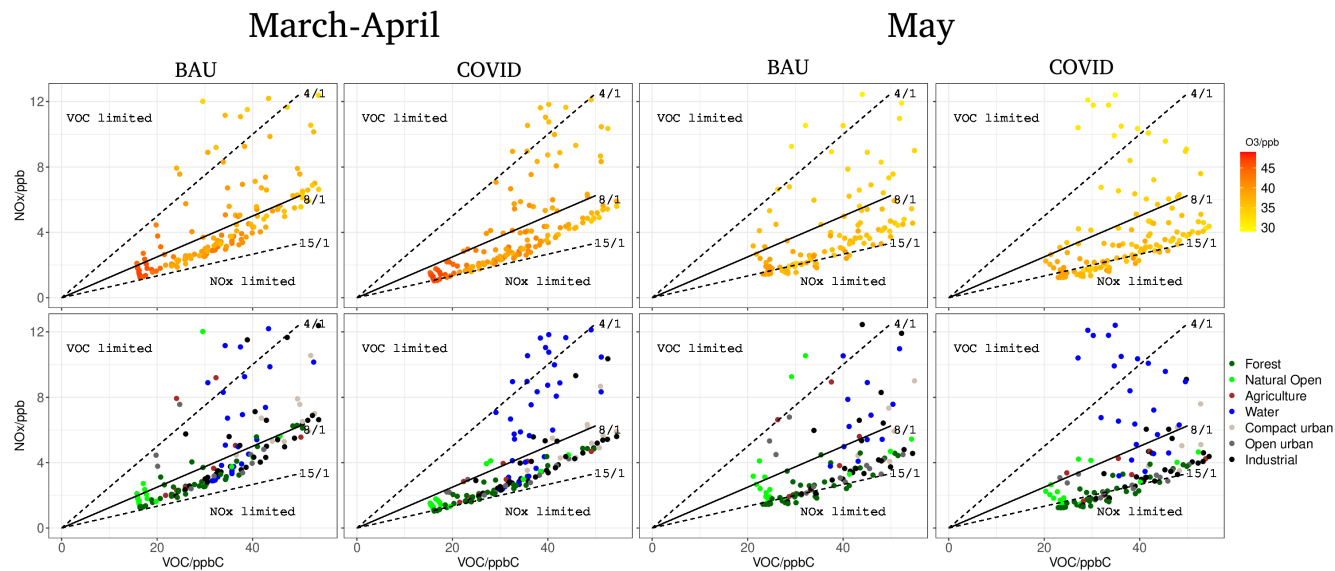

Figure 6: Change in O<sub>3</sub> concentrations (top panels) for 30 March to 12 April (only weekdays) and 18 to 30 May (only weekdays) for both simulations, BAU (left panels) and COVID (right panels), over the AMB area during the morning (6-8 UTC). The land use is also displayed for each grid (bottom panels).

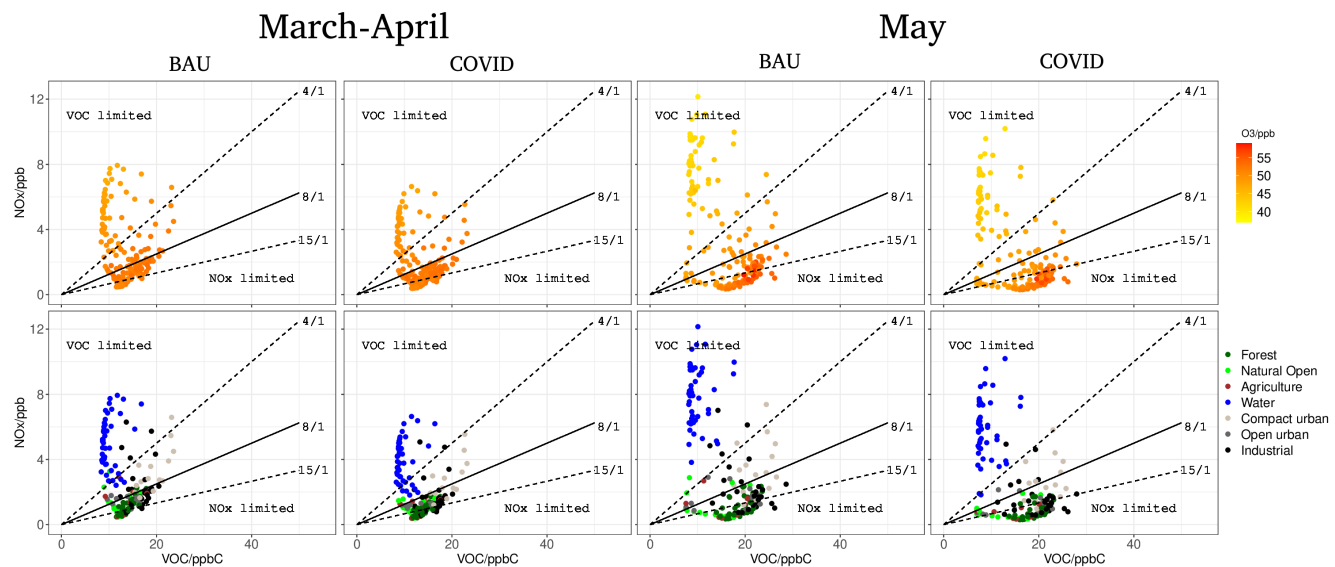

Figure 7: Same as Figure 6 during the afternoon (13-15 UTC).



Table 3. Averages NO<sub>x</sub> /VOC ratio and ozone concentrations from 30 March to 12 April (only weekdays) and 18 to 30 May (only weekdays) in the morning (6-8 UTC), afternoon (13-15 UTC) and evening (19-21 UTC). Light grey and dark grey cells indicate VOCs and NO<sub>x</sub> regimes, respectively. The relative changes in ozone concentrations (%) are shown in brackets and were calculated as ((COVID-BAU)/BAU)×100.

| March-April            | Landuse       | Morning |              | Afternoon |              | Evening |              |
|------------------------|---------------|---------|--------------|-----------|--------------|---------|--------------|
|                        |               | BAU     | COVID        | BAU       | COVID        | BAU     | COVID        |
| [NO <sub>x</sub> /VOC] | Forest        | 0.102   | 0.083        | 0.073     | 0.059        | 0.143   | 0.111        |
|                        | Natural Open  | 0.158   | 0.098        | 0.109     | 0.077        | 0.194   | 0.122        |
|                        | Agriculture   | 0.156   | 0.100        | 0.113     | 0.077        | 0.195   | 0.101        |
|                        | Water         | 0.25    | 0.201        | 0.495     | 0.393        | 0.707   | 0.535        |
|                        | Compact urban | 0.166   | 0.139        | 0.171     | 0.137        | 0.236   | 0.184        |
|                        | Open urban    | 0.125   | 0.088        | 0.108     | 0.081        | 0.182   | 0.135        |
|                        | Industrial    | 0.149   | 0.120        | 0.135     | 0.100        | 0.215   | 0.151        |
| O <sub>3</sub> (ppb)   | Forest        | 40.3    | 40.7 (1.0 %) | 51.7      | 51.7 (0.0 %) | 42.3    | 42.9 (1.3 %) |
|                        | Natural Open  | 42.8    | 43.9 (2.5 %) | 51.7      | 51.9 (0.3 %) | 45.4    | 46.4 (2.1 %) |
|                        | Agriculture   | 37.3    | 38.5 (3.4 %) | 51        | 51.2 (0.4%)  | 40.7    | 42.2 (3.7 %) |
|                        | Water         | 37      | 38.7 (4.6 %) | 48.6      | 49.4 (1.6 %) | 42.1    | 44.2 (5.0 %) |
|                        | Compact urban | 35.8    | 36.9 (2.9 %) | 52        | 52.3 (0.6 %) | 40.4    | 42.2 (4.3 %) |
|                        | Open urban    | 39.4    | 40.4 (2.4 %) | 52.6      | 52.8 (0.3 %) | 42.6    | 43.6 (2.4 %) |
|                        | Industrial    | 36.8    | 37.7 (2.3 %) | 52.2      | 52.5 (0.5 %) | 40.1    | 41.8 (4.2 %) |

| May                    | Landuse       | Morning |               | Afternoon |               | Evening |               |
|------------------------|---------------|---------|---------------|-----------|---------------|---------|---------------|
|                        |               | BAU     | COVID         | BAU       | COVID         | BAU     | COVID         |
| [NO <sub>x</sub> /VOC] | Forest        | 0.076   | 0.066         | 0.053     | 0.043         | 0.139   | 0.115         |
|                        | Natural Open  | 0.122   | 0.087         | 0.078     | 0.052         | 0.194   | 0.129         |
|                        | Agriculture   | 0.122   | 0.090         | 0.077     | 0.046         | 0.192   | 0.118         |
|                        | Water         | 0.349   | 0.279         | 0.792     | 0.663         | 1.327   | 1.028         |
|                        | Compact urban | 0.137   | 0.121         | 0.156     | 0.125         | 0.261   | 0.210         |
|                        | Open urban    | 0.101   | 0.078         | 0.099     | 0.072         | 0.191   | 0.150         |
|                        | Industrial    | 0.125   | 0.104         | 0.107     | 0.075         | 0.230   | 0.165         |
| O <sub>3</sub> (ppb)   | Forest        | 36.9    | 36.7 (-0.6 %) | 51.3      | 50.5 (-1.6 %) | 37.7    | 37.6 (-0.1 %) |
|                        | Natural Open  | 37.0    | 37.3 (0.6 %)  | 48.9      | 48.3 (-1.3 %) | 40.3    | 40.6 (0.8 %)  |
|                        | Agriculture   | 33.3    | 33.8 (1.4 %)  | 50.5      | 49.9 (-1.2 %) | 36.3    | 37.3 (3.0 %)  |
|                        | Water         | 29.7    | 31.2 (4.9 %)  | 42.5      | 43.4 (2.2 %)  | 32.0    | 35 (9.4 %)    |
|                        | Compact urban | 33.6    | 33.9 (1.0 %)  | 50.8      | 50.4 (-0.8 %) | 35.8    | 37.2 (3.8 %)  |
|                        | Open urban    | 36.7    | 36.9 (0.5 %)  | 51.3      | 50.7 (-1.1 %) | 38.2    | 38.6 (1.1 %)  |
|                        | Industrial    | 34.3    | 34.6 (0.9 %)  | 52.1      | 51.6 (-1.1 %) | 36.3    | 37.6 (3.5 %)  |

L326, L330 the discussion reverts to ozone levels, not differences between scenarios. Could this discussion be made more consistent?

Response: Thank you for this comment. We have updated this part and now the discussion in Section 5.1 is more consistent and reads:

In terms of ozone levels (BAU simulation), high values during the morning (40-43 ppb) and evening (46-47 ppb) hours are found in suburban areas (forest and natural open) because there is less NO (because of less traffic) and thus less ozone degradation. In the afternoon, high O<sub>3</sub> levels are found everywhere in the AMB (49-55 ppb), especially in urban areas (industrial, open urban and compact urban).

L319 grid points not grid.

Response: Amended.

SS5.2 discusses the oxidising capacity in terms of OH and NO<sub>3</sub>. Is there any impact on ozone budgets seen from changing HO (and presumably OH:HO<sub>2</sub> ratio), particularly in HO<sub>2</sub> + NO vs OH + NO<sub>2</sub> vs OH + O<sub>3</sub>?

Response: Thank you for this constructive comment. The atmospheric oxidation capacity is to a large extent determined by budgets of the hydroxyl radical (OH). At night, the oxidizing capacity is due to the oxidation by NO<sub>3</sub> and O<sub>3</sub>. Our discussion in the atmospheric oxidation capacity is based on the mixing ratios of OH, NO<sub>3</sub> and O<sub>3</sub>. Making an exhaustive analysis of the ozone loss (O<sub>3</sub>+OH) and production (HO<sub>2</sub>+NO, OH+NO<sub>2</sub>) rates is out of the scope of this paper. However, we have now expanded the description of the oxidation capacity of the Introduction and re-written section 5.2. and now reads:

Introduction, lines 85-94: Only a few studies have reported enhanced atmospheric oxidation capacity (AOC), which describe the removal rate of primary pollutants and the formation of secondary species, and associated O<sub>3</sub> increases during the COVID-19 lockdown due to increases in the major oxidants OH, hydroperoxy radical (HO<sub>2</sub>) and nitrate radical (NO<sub>3</sub>) (Zhu et al., 2021; Wang et al., 2021b, 2022). . The predominant oxidant for AOC during the daytime is OH, since NO<sub>3</sub> radicals photolyse rapidly during daytime, which is responsible for the oxidation and removal of most natural and anthropogenic trace gases (Elshorbany et al., 2009; Saiz-Lopez et al., 2017). On the other hand, during the night the concentration of OH is significantly reduced, and the AOC is then controlled by NO<sub>3</sub>, together with O<sub>3</sub>, which is also an important oxidant (Elshorbany et al., 2009; Saiz-Lopez et al., 2017). During the lockdown, the significant decreases in NO<sub>2</sub> concentrations increased the OH levels, which led to the formation of harmful oxidants such as O<sub>3</sub> (Zhu et al., 2021; Wang et al., 2021b, 2022).. Therefore, the AOC is an indicator used to design control policies for secondary species.

**Section 5.2, lines 360-378:** The increase of these free radical concentrations could be the leading cause for the diurnal O<sub>3</sub> increases (see Fig. S5 in the Supplement) given that VOC and CO oxidation by OH are the initial reactions for ozone formation. In addition, the NO<sub>3</sub> radical, which is a primary night-time oxidant, also increases in areas close to the airport and harbour (4 ppt, 210%). This increase can be explained by reductions in the VOC and NO<sub>2</sub> levels, which are important sinks for NO<sub>3</sub> radicals (Elshorbany et al., 2009; Saiz-Lopez et al., 2017).

During the period in May, we also found increases in the oxidants radicals (OH, NO<sub>3</sub>) and also O<sub>3</sub> (see Fig. S5 in the Supplement) of the COVID simulation with respect to the BAU, in areas where substantial NO<sub>x</sub> emission reduction took place such as the airport and harbour. In these areas, OH levels increase up to 0.3 ppt (55%) in the afternoon, and NO<sub>3</sub> increases up to 4 ppt (230%) in the evening. However, other areas showed general decreases in AOC radicals (-0.1 ppt for OH and -2 ppt for NO<sub>3</sub>), resulting in decreases in the O<sub>3</sub> levels. Note that for both periods, the decrease in shipping emissions (a source of NO<sub>x</sub>) led to increases in the levels of both radicals along the ship tracks.

Our results indicate that changes in the anthropogenic emissions (mainly NO<sub>x</sub> and VOC) lead to significant changes in the OH and NO<sub>3</sub> radicals levels, which in the case of emission reduction, such as that experienced during the COVID lockdown, lead to enhanced oxidation efficiency in the urban atmosphere of the AMB and O<sub>3</sub> enhancements. However, during the period in May, when O<sub>3</sub> formation increased due to warm temperatures and increase in biogenic emissions, there was a decrease in the AOC (except in the airport and harbour areas) for the COVID run. The elevations of AOC occurred because these areas were still VOC-limited regimes during this period. In terms of air quality policy, it is important to understand the interplay between these free radicals and O<sub>3</sub> chemistry so that mitigation strategies are not counterproductive.

SS5.3 is very nice, and might be improved in consistency with a discussion of Ox (and maybe formation of Ox/NO<sub>x</sub> reservoirs and sinks) as in previous sections.

**Response:** Thank you for this comment. We have added more discussion of Ox in this section.

**Section 5.3, lines 418-420:** The decreases in ozone precursor emissions (COVID simulation) resulted in less ozone production from the AMB plume as well as production of new O<sub>3</sub>, and consequently, the ozone concentrations decreased.

**Section 5.3, lines 428-430:** The improvement in the air quality is consistent with the decrease in surface Ox concentrations seen during the period of May over most of the Catalonia region (see section 4) .

S6 summarises nicely. The sentence in L438 'this was consistent...' needs to be expanded.

Response: Thank you for this comment. We have now expanded this sentence and now reads:

This was consistent with the unchanged or decreased AOCs, given their relation with O3 production.

L454 'data used in this study...' add 'are'

Response: Amended.

Overall

Response: We do not understand this comment.
